# Supplementary material
Source: Royal Society of Chemistry journal article supplement (https://www.rsc.org/suppdata/cc/1998/1043/h801424.doc)
Supplement: Supplementary file 1 [file h801424.doc]

**Supplementary Data**

**Rules for Generating N*poss*.**

1. Cyclic motifs for which each molecule contains both a donor and an acceptor.

*Where:*

*A = acceptor,*

*D = donor (atom attached directly to H),*

*X = atom attached directly to acceptor in fragment.*

= *connectivity through one or more covalent bonds*

Two fragments, each comprising a donor and acceptor group, which share a common H atom are both considered as being able to form a given motif *only* if the atoms X to which the acceptor atoms A are attached are different. Similarly, two fragments sharing a common acceptor atom A are counted *only* if the atoms to which the hydrogen atoms are attached (the donor atoms D) are different. This applies even where the chemical constitutions of the two fragments are different.

Thus, only one O=C-N-H fragment is counted for a primary amide RC(=O)NH2 (the X atom is the same for both H atoms), reflecting the impossibility of both hydrogen atoms being *syn* to the carbonyl oxygen atom.

If the atoms X to which the acceptors are attached are also the donor atoms D (e.g. an oxime group NOH, in which X=D = O), it follows from these rules that only fragments which do not have common H or acceptor atoms are counted. Fragments in which the H atoms are bonded directly to the acceptor (i.e. H-A) are treated in an analogous manner.

2. Cyclic motifs for which the donors are present in one molecule and the acceptors in the other molecule.

For functional groups comprising donors it is necessary that the donor atoms D to which the H atoms are attached are different if both fragments are to be counted. Similarly for groups comprising acceptors, fragments are counted only if the atoms X to which the acceptors A are attached are different. Thus, three H-N-C-N-H fragments are counted for a [C(NH2)3]+ cation, reflecting the existence of only 3 pairs of H atoms which are mutually adjacent.

All fragments are counted if the atom to which the H or acceptor atoms are attached is common to both H or acceptor atoms in each fragment. One H-D-H fragment is thus counted for water, three for ammonia and six for the ammonium ion, reflecting the number of combinations of pairs of H atoms. Similarly, no fragments are excluded where the donor or acceptor group in a molecule comprises a single donor or acceptor. As a consequence, four H‑D fragments would be counted for an ammonium cation and three O(-X) acceptors for a carbonate anion.
